# Supplementary material
Source: publisher site journal article supplement (https://www.dovepress.com/article/109406)
Supplement: Supplementary file 1 [file get_supplementary_file.php]

Supplementary Data:  $^1\text{H}$  nuclear magnetic resonance spectroscopy (NMR) of prepared Gua-SS-PAA (CAR-CBA and CHL-CBA).

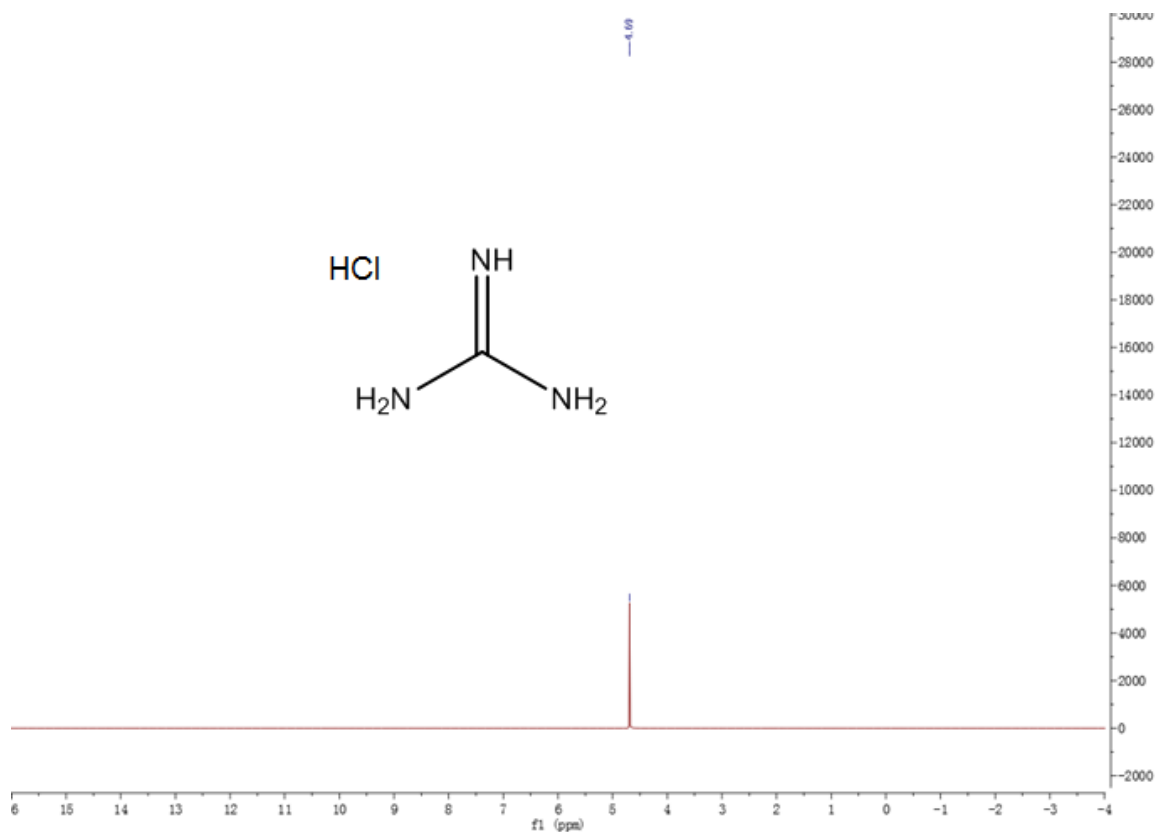

Supplementary Fig. 1  $^1\text{H}$  nuclear magnetic resonance spectroscopy (NMR) of Carbamidine Hydrochloride (CAR).

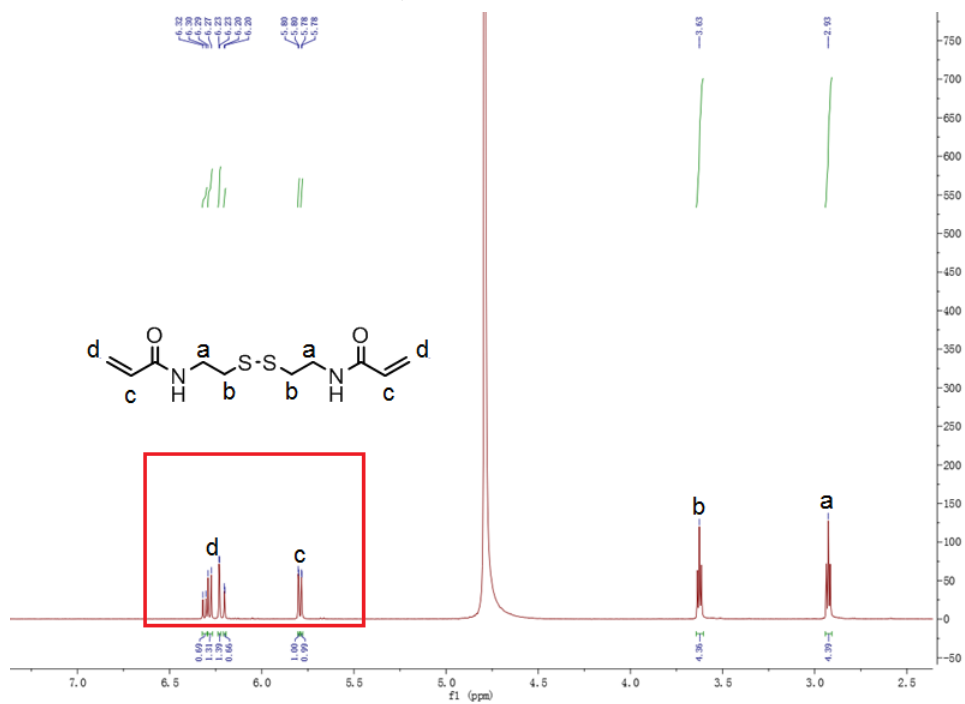

Supplementary Fig. 2  $^1\text{H}$  nuclear magnetic resonance spectroscopy (NMR) of N, N'-cystaminebisacrylamide (CBA).

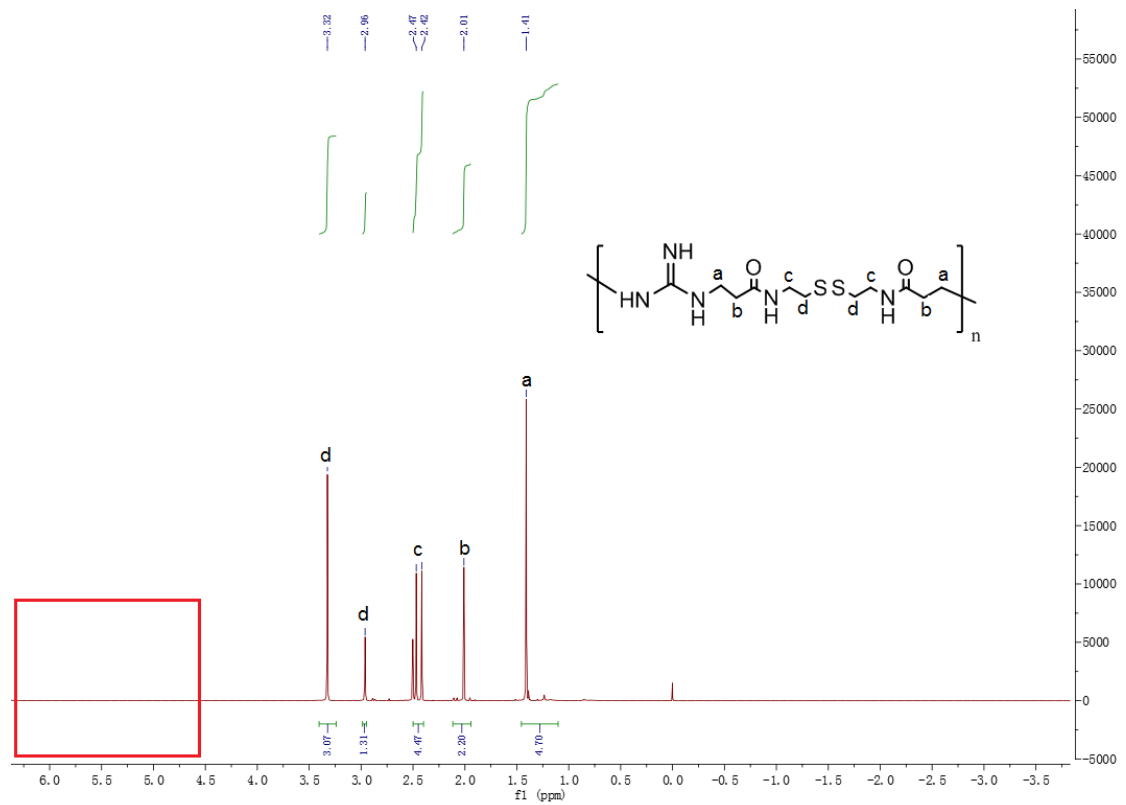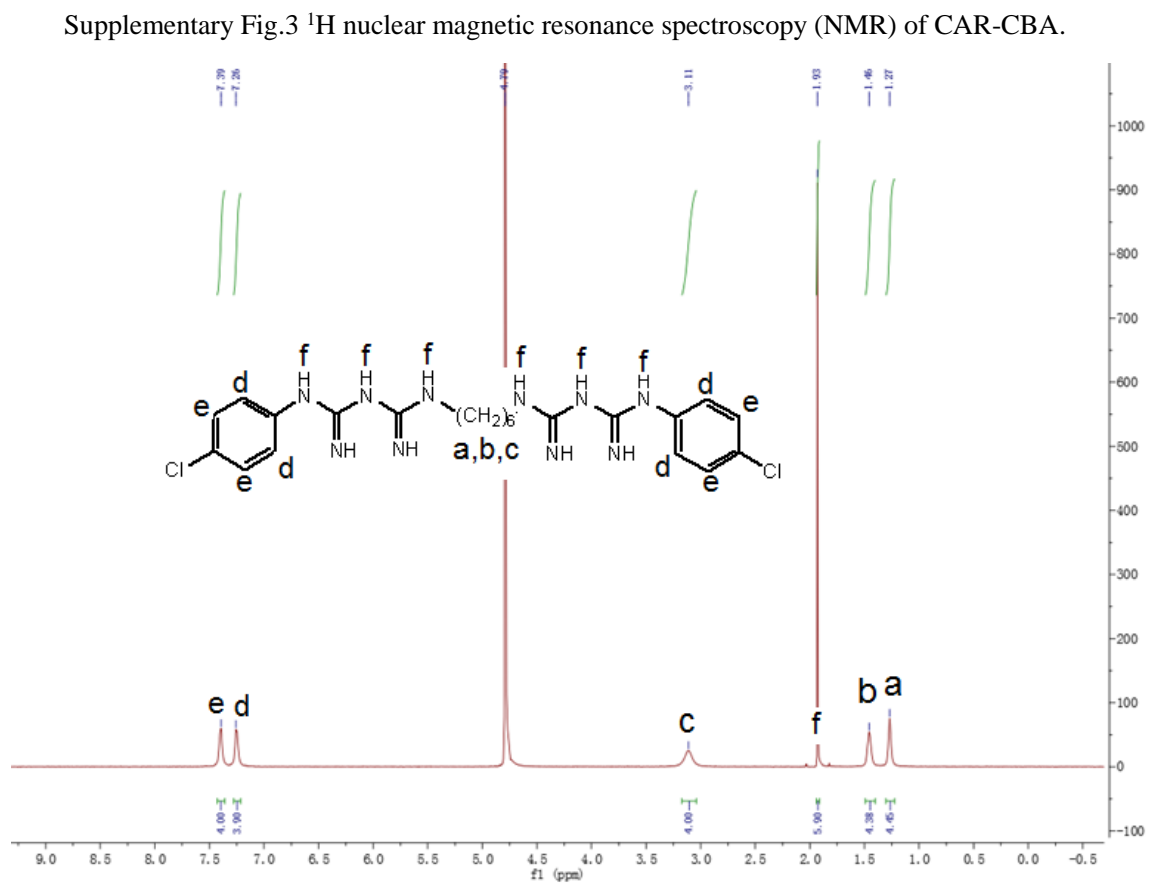

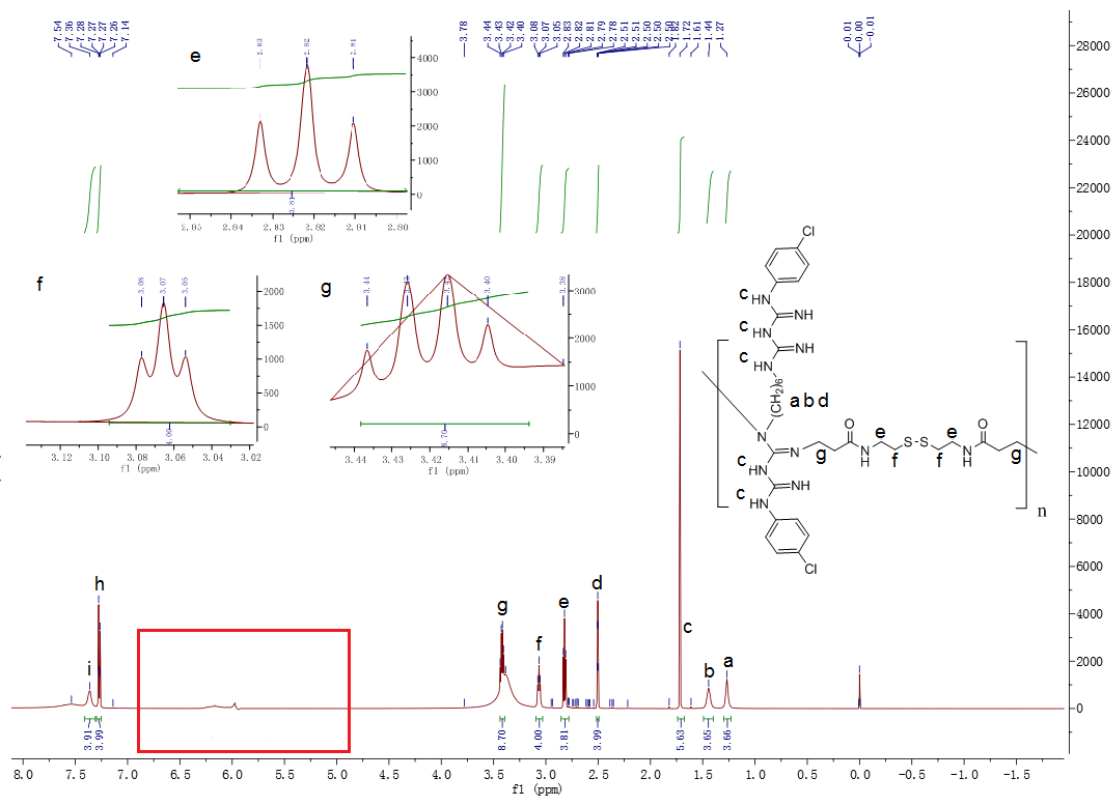

Supplementary Fig.5  $^1\text{H}$  nuclear magnetic resonance spectroscopy (NMR) of CHL-CBA.
